# Supplementary material
Source: Springer Nature journal article supplement (https://www.springermedizin.de/resource/supplementary/13054_2009_8382_MOESM2_ESM.pdf/9731838)
Supplement: MOESM2 [file 9731838]

**Resuscitation attempted**

n = 426

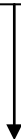

**Return of spontaneous circulation**

n = 178

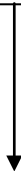

**Discharged alive**

n = 76

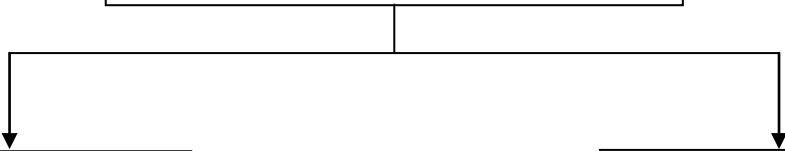

**Patients with exclusion  
criteria**

n = 24

**Patients, included in  
the research**

n = 52
